# Supplementary material
Source: HighWire-hosted journal article supplement (http://www.qdcxjkg.com/highwire/filestream/113763/field_highwire_adjunct_files/0/ERJ-00833-2012_Disclosures.pdf)
Supplement: ERJ-00833-2012_Disclosures.pdf [file ERJ-00833-2012_Disclosures.pdf]

**M. Arzt:** has previously received lecture fees from AstraZenca, Covidien, Philips Home Healthcare Solutions (Murrysville, PA, USA) and Resmed (Martinsried, Germany). M.A. has received grant support Philips Home Healthcare Solutions (Murrysville, PA, USA) Resmed (Martinsried, Germany) and the German Foundation for Cardiac Research (Deutsche Stiftung für Herzforschung). M.A. is the holder of an endowed professorship from the Free State of Bavaria at the University of Regensburg that was donated by Philips Home Healthcare Solutions (Murrysville, PA, USA) and Resmed (Martinsried, Germany).

**K. Lewis:** has received grant support from Pfizer Inc. K.L. has received lecture fees and reimbursement for attending conferences from Pfizer, AstraZeneca and Glaxo-Smith Kline. K.L. has participated in advisory boards for MSD, AstraZeneca and Glaxo-Smith Kline.
